# Supplementary material
Source: PubMed Central journal article supplement (PMC3923301)
Supplement: NIHMS551984-supplement-01.pdf [file NIHMS551984-supplement-01.pdf]

**Figure S1.**

A)

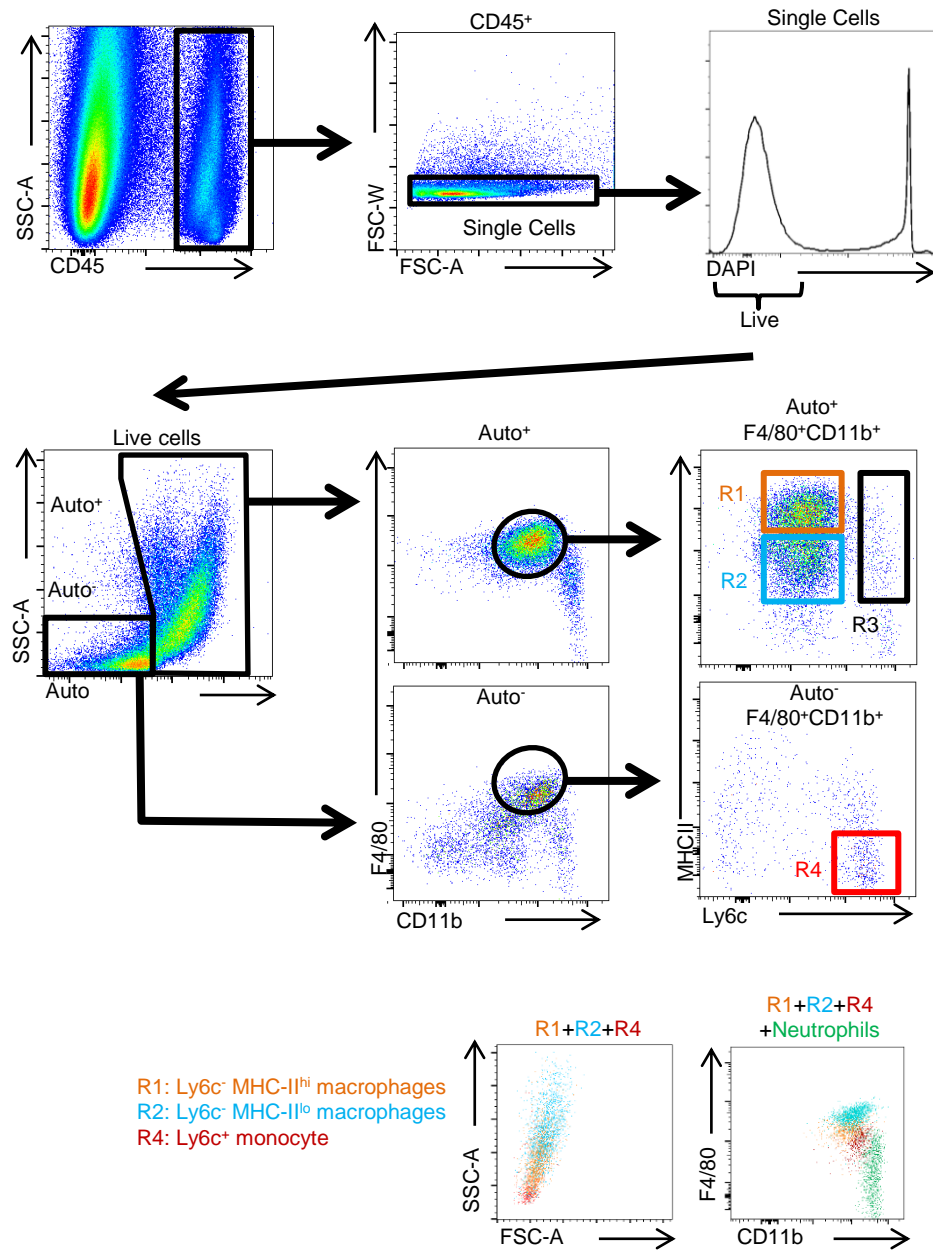

B)

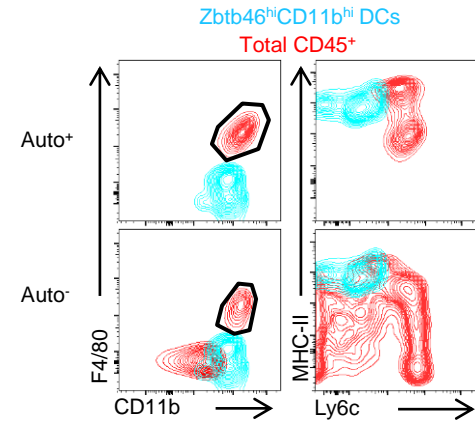

Figure S2.

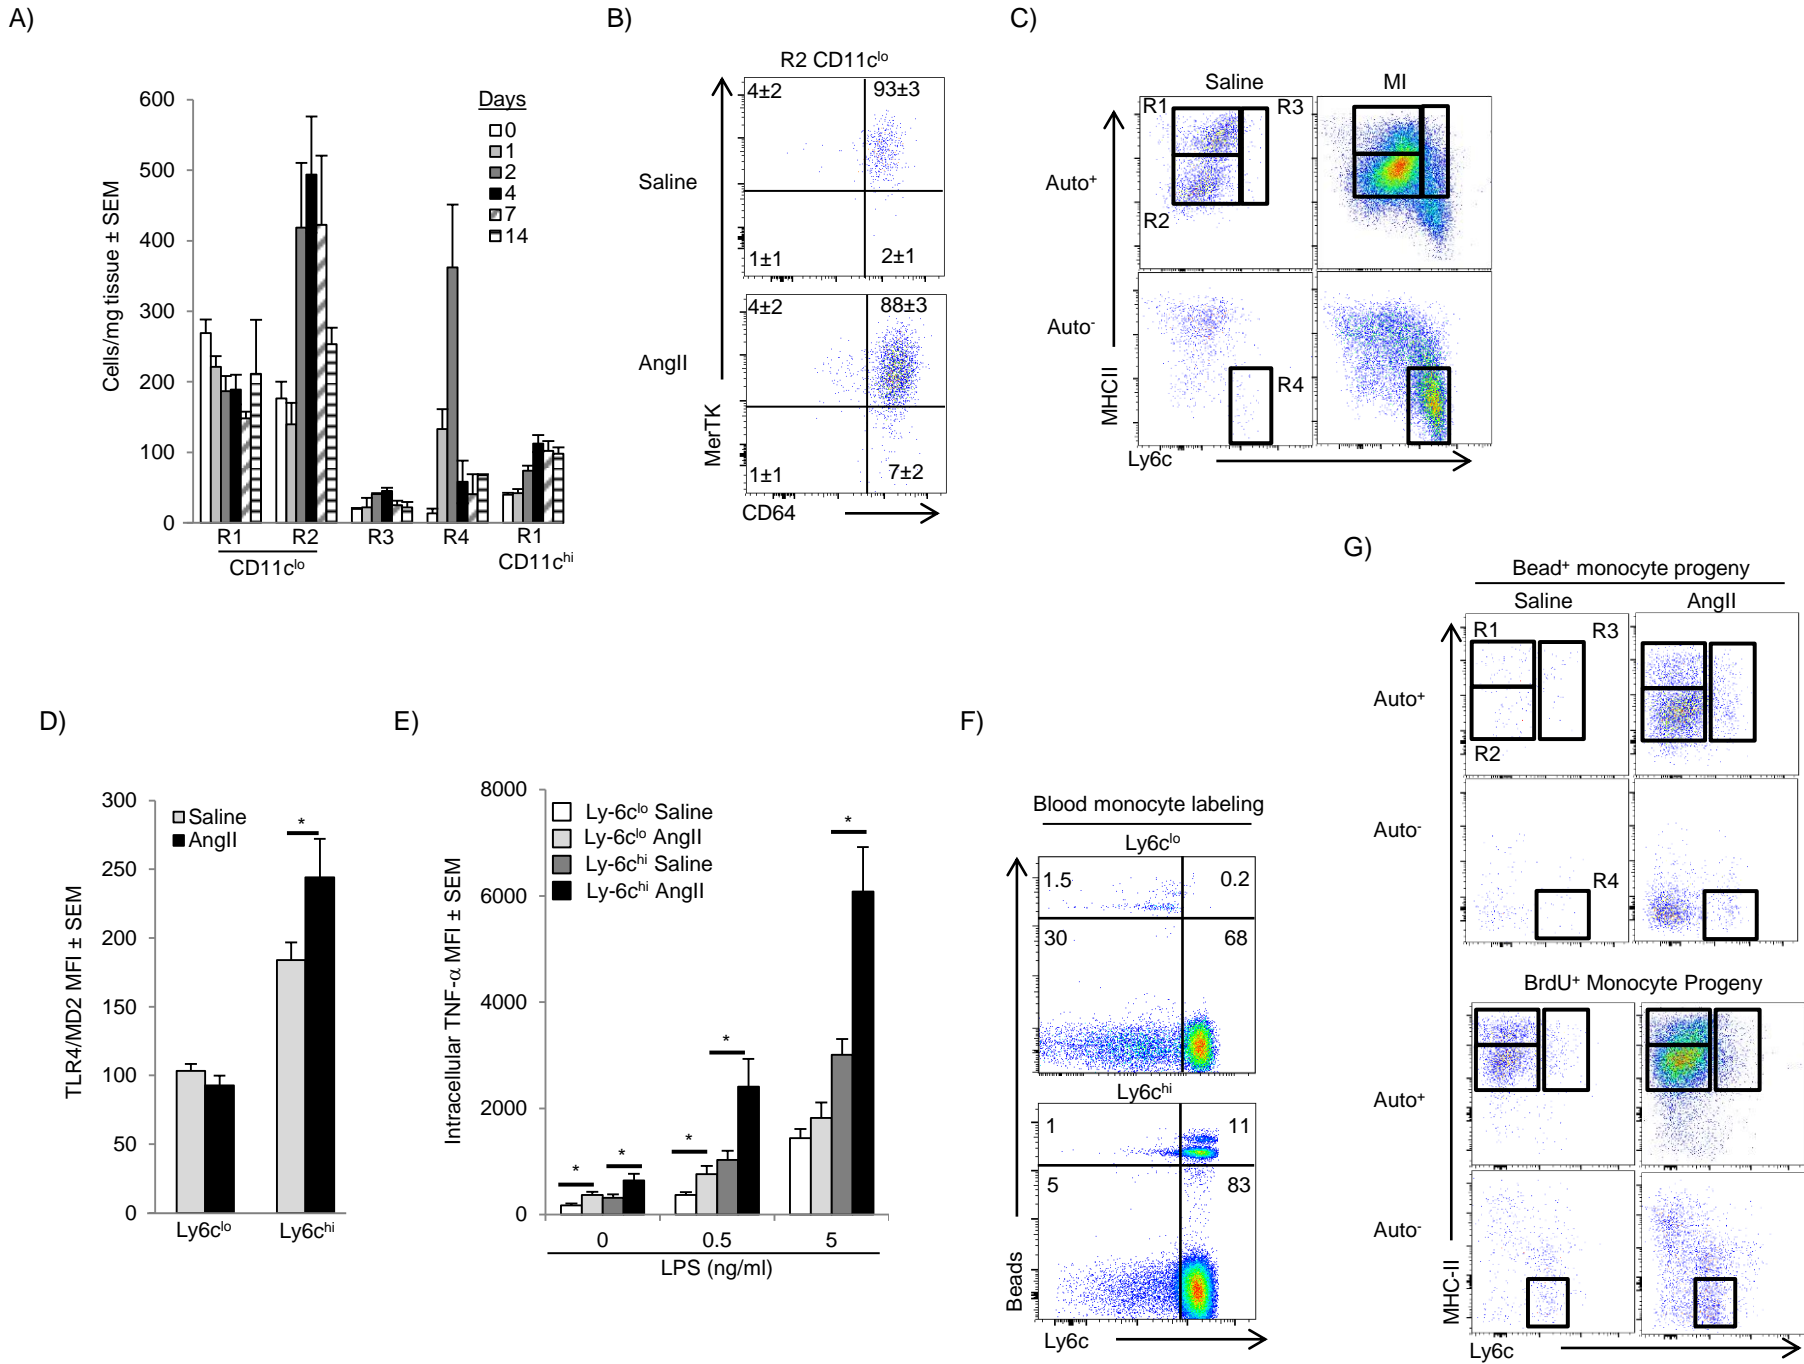

Figure S3.

A)

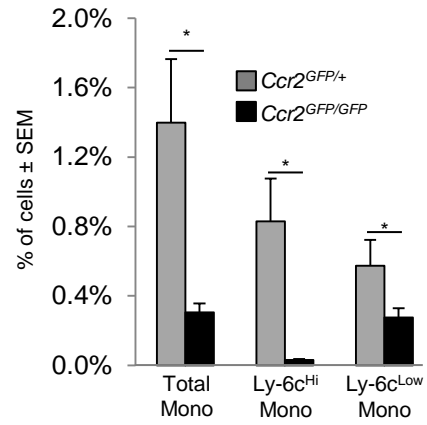

B)

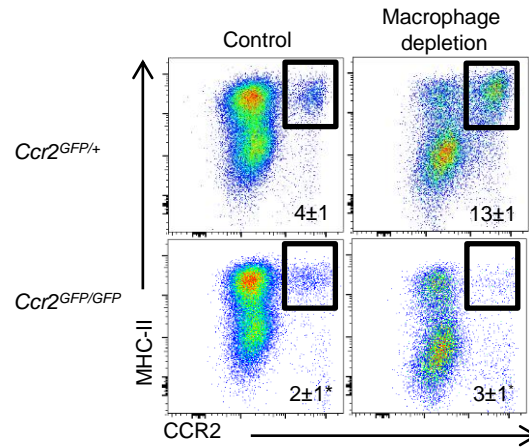

C)

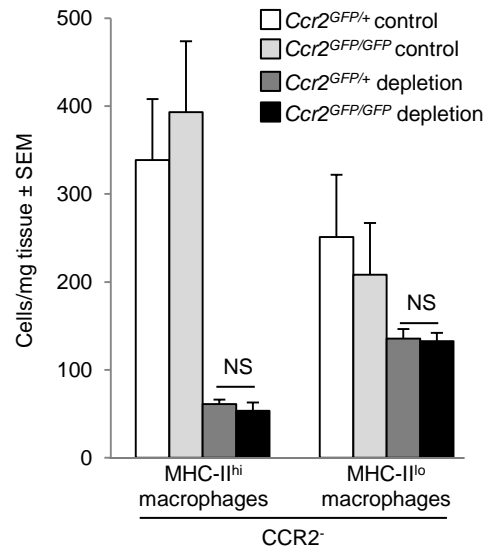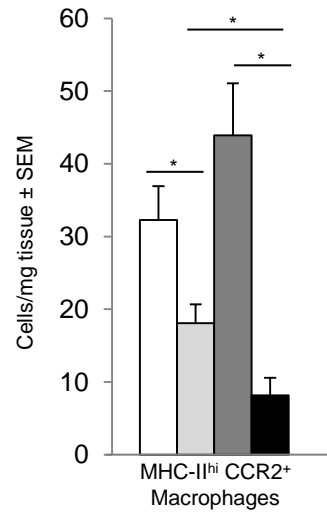

Figure S4.

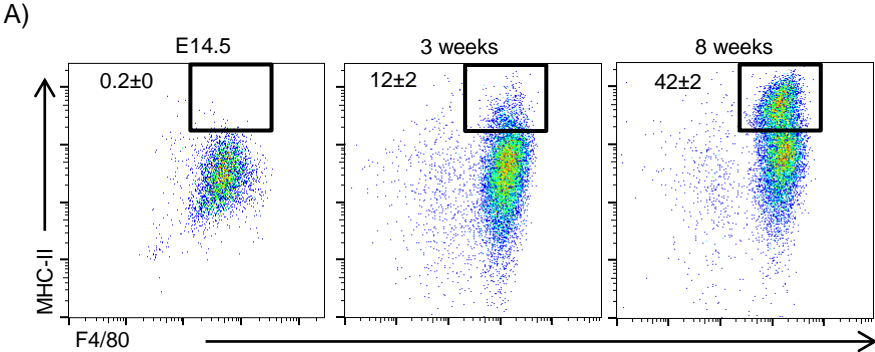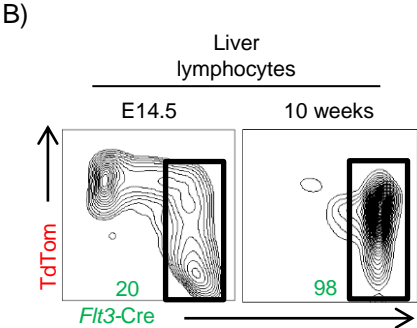

Figure 5S.

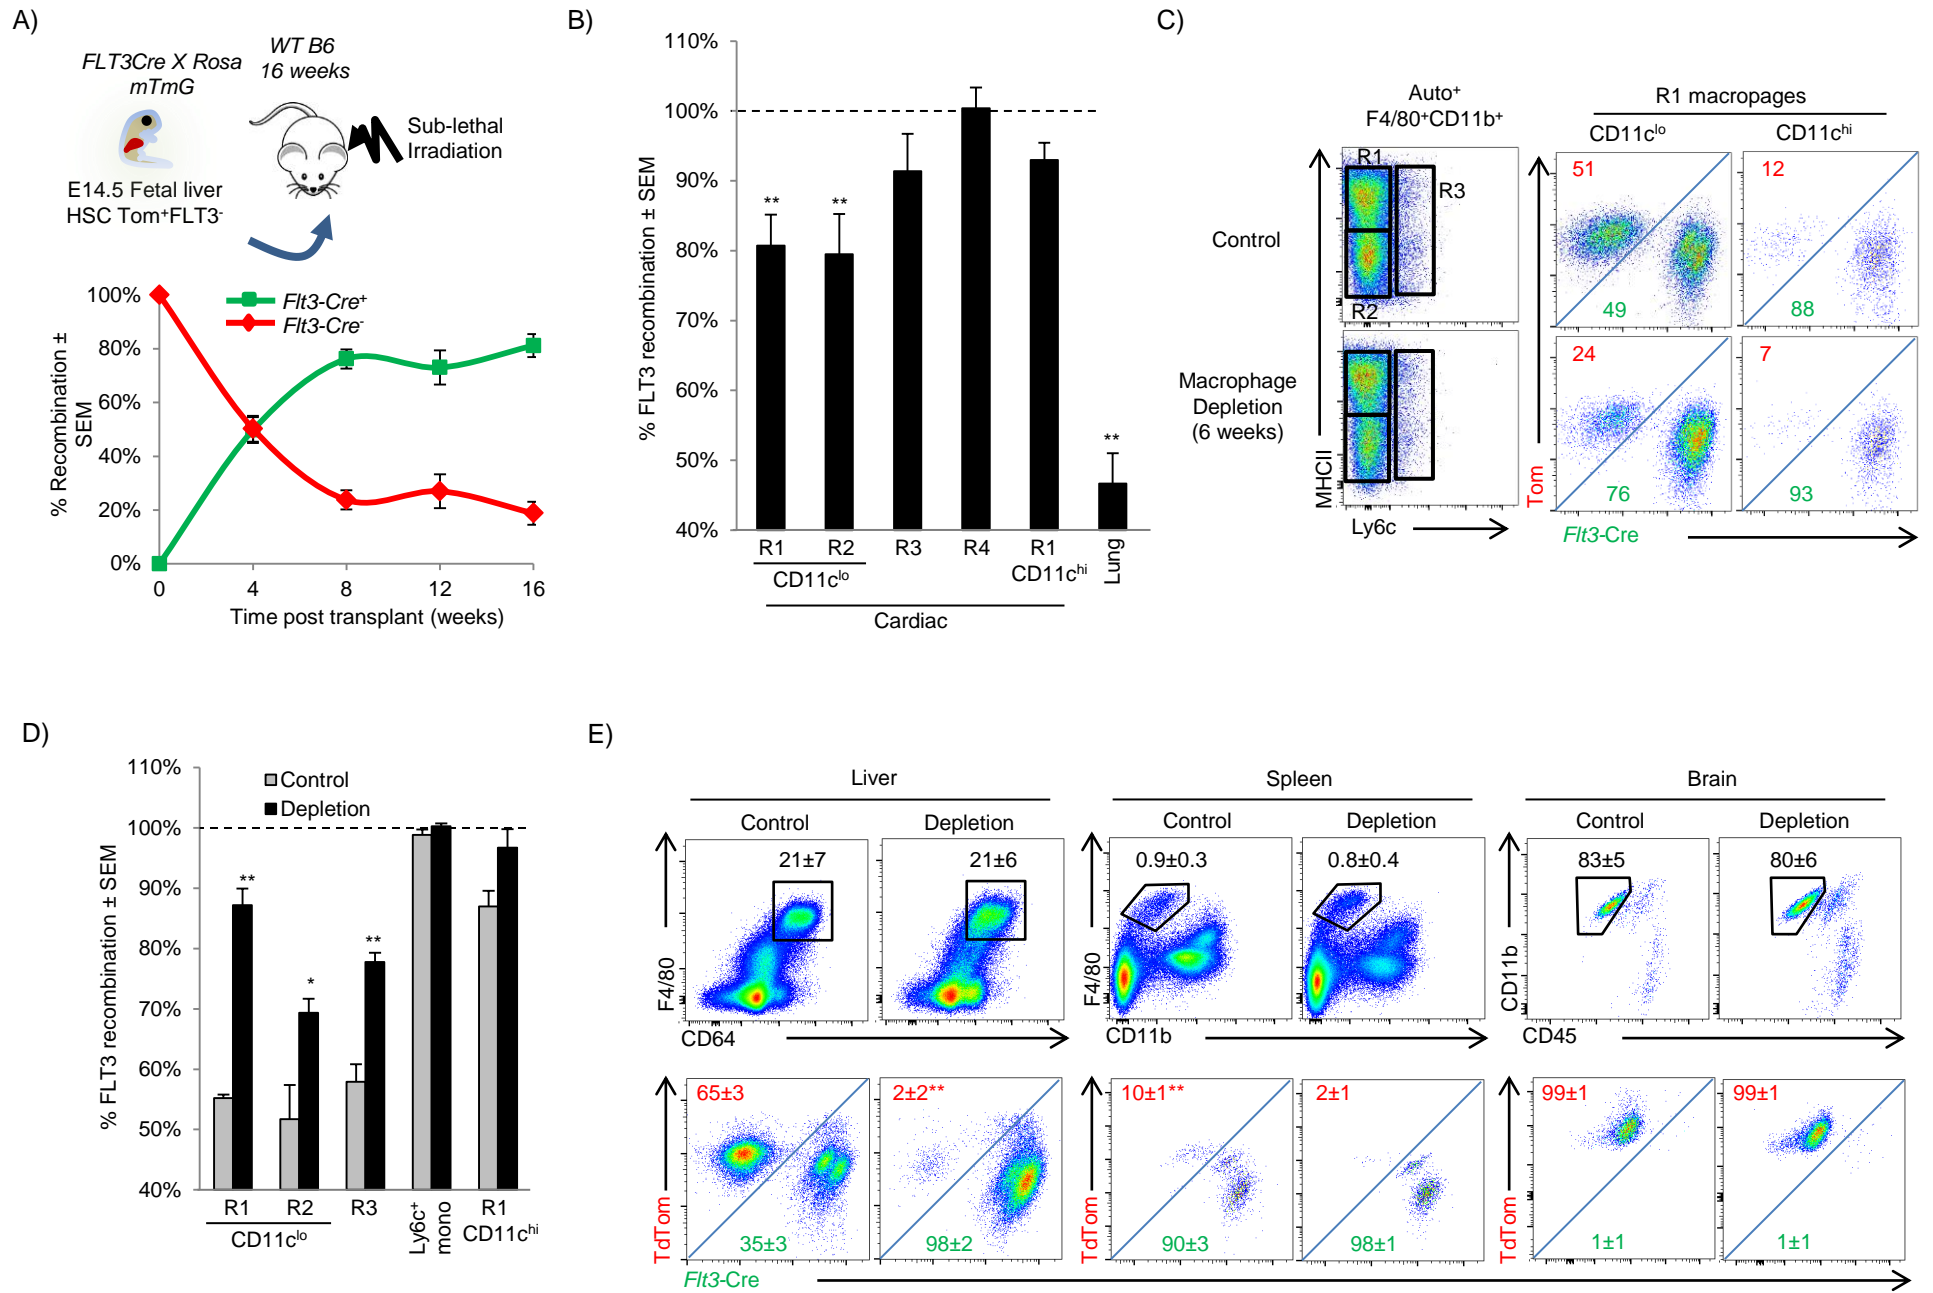

Figure S6

A)

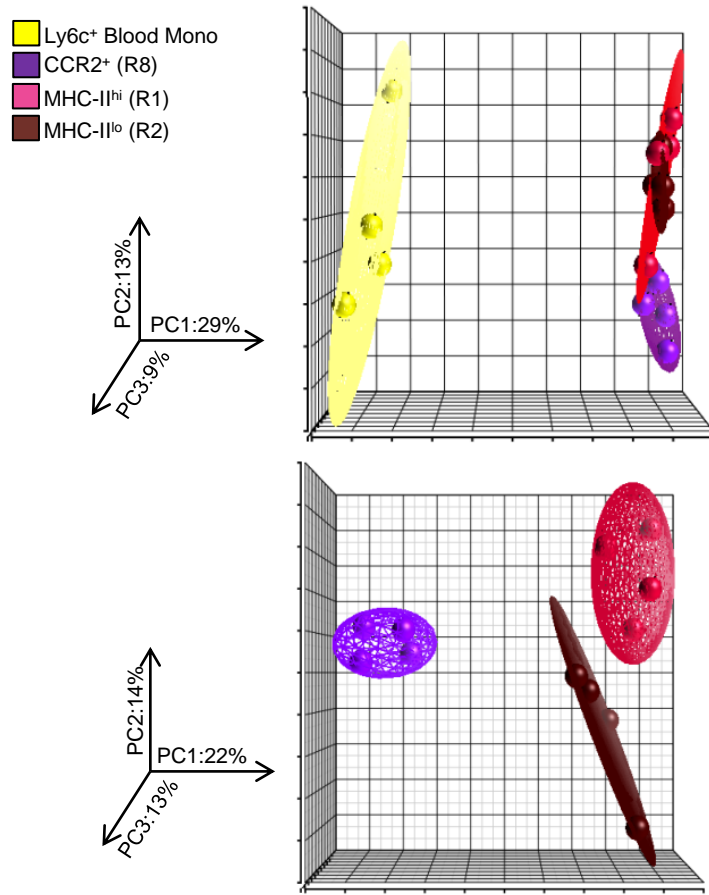

B)

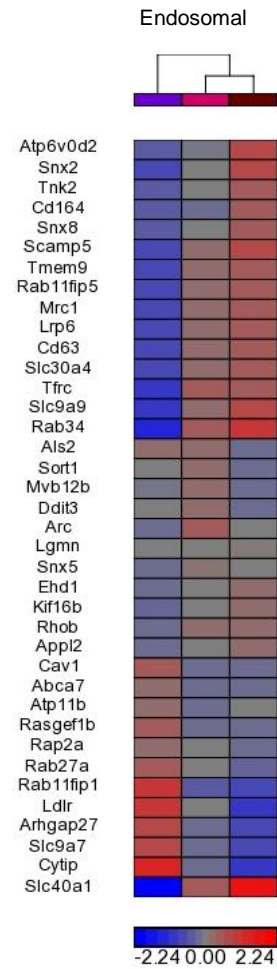

C)

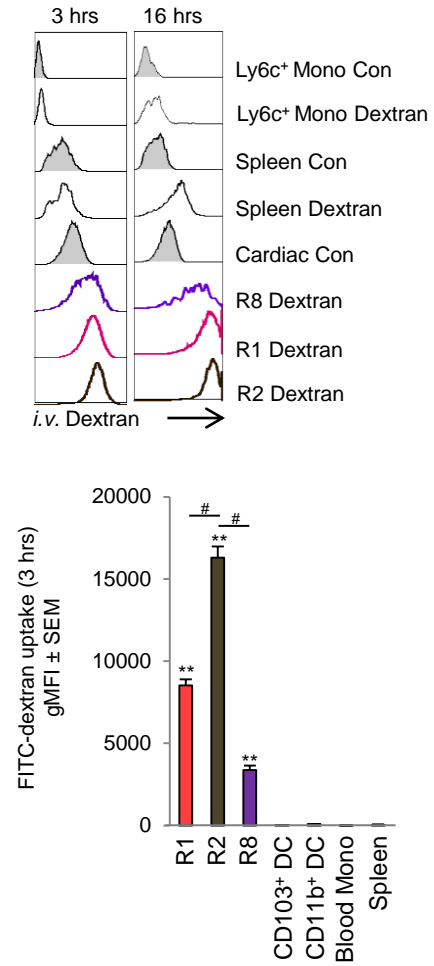

Figure S7

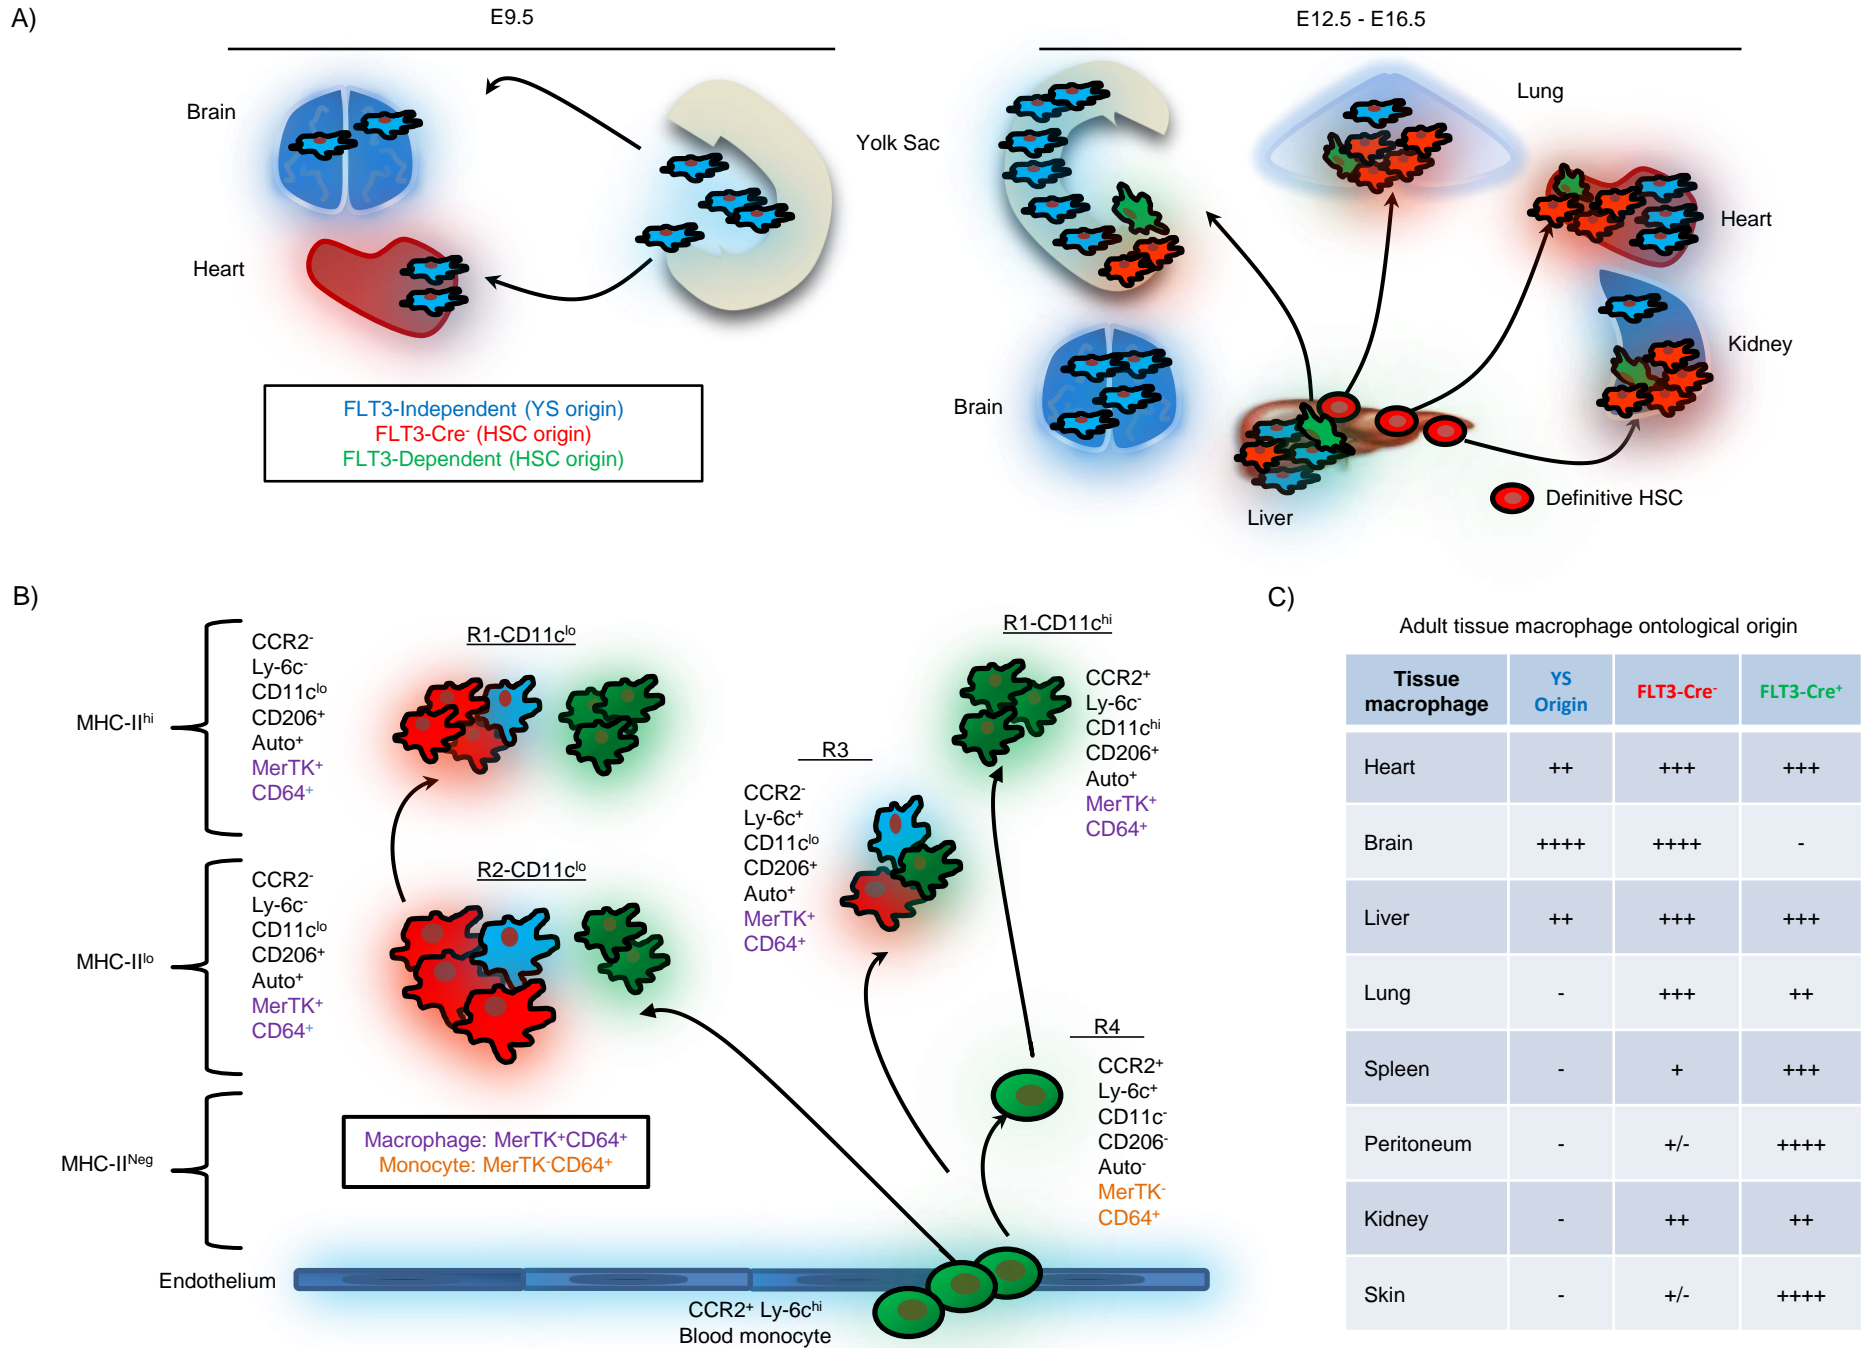

## Supplemental Figure Legends

**Figure S1. Cardiac macrophage gating strategy (related to Fig 1).** Single cell cardiac tissue suspensions were prepared and labeled (see Table S1 for antibody list and Fig 1A). A) CD45<sup>+</sup> leukocytes were identified, doublets excluded (by FSC-W vs. FSC-A) and dead cells excluded by DAPI. Live cells were stratified by autofluorescence (Auto<sup>+</sup> or Auto<sup>-</sup>), gated on F4/80<sup>+</sup>CD11b<sup>+</sup> myeloid cells and then further stratified by MHC-II and Ly6c expression. R1: MHC-II<sup>hi</sup> macrophages (Orange). R2: MHC-II<sup>lo</sup> macrophages (blue). R3: Ly6c<sup>+</sup> macrophages (black). R4: Ly6c<sup>hi</sup> monocytes (Red). Size (FSC-A) and granularity (SSC-A) was assessed by flow cytometry of the cardiac macrophage and monocyte populations identified, as was relative F4/80 and CD11b expression in wild type (WT) mice. Neutrophils were identified as CD45<sup>+</sup>CD11b<sup>+</sup>Ly6g<sup>+</sup>F4/80<sup>-</sup> (green). B) In order to identify where CD11b<sup>+</sup> DCs were in our macrophage gating strategy we analyzed *Zbtb46*<sup>GFP/+</sup> mice and gated on CD11b<sup>+</sup> DCs as in Fig 1D (live CD45<sup>+</sup>Auto<sup>-</sup>MHC-II<sup>hi</sup>CD11c<sup>hi</sup>CD11b<sup>+</sup>CD103<sup>-</sup>Zbtb46<sup>hi</sup>). We backed gated these CD11b<sup>+</sup> DCs into our original Auto<sup>+</sup> and Auto<sup>-</sup> gates and included their relative distribution (F4/80 vs. CD11b) and (MHC-II vs. Ly6c). The MHC-II vs. Ly-6c plots contained cells that were F4/80<sup>+</sup>CD11b<sup>+</sup>. Total CD45<sup>+</sup> cells (red) were superimposed with CD11b<sup>+</sup> DCs (blue). MHC-II vs. Ly6c plots contain F4/80<sup>+</sup>CD11b<sup>+</sup> myeloid cells that were gated. *Zbtb46*<sup>hi</sup> CD11b<sup>+</sup> DCs would not have been carried over from the original F4/80 vs. CD11b gate since they were essentially F4/80<sup>-</sup>, however we included their position to demonstrate where they would have been located, had they not been excluded earlier.

**Figure S2. AngII infusion model to study cardiac monocyte and macrophage dynamics (related to Fig 3).**

A-B) WT mice were implanted with subcutaneous osmotic mini-pumps that infused angiotensin II (2 mg/kg/day) or saline and cardiac cellular infiltration was assessed from 1-14 days. The regions displayed were gated as in Fig 1A (R1: MHC-II<sup>hi</sup> macrophages, R2: MHC-II<sup>lo</sup> macrophages, R3: Ly6c<sup>+</sup> macrophages, R4: Ly6c<sup>+</sup> monocytes). B) MerTK / CD64 expression on R2 (MHC-II<sup>lo</sup> CD11c<sup>lo</sup>) macrophages. C) WT mice received surgical myocardial infarction. Cardiac tissue in the infarcted / peri-infarcted area was removed 4 days after instrumentation and cardiac cellular infiltration was assessed. Cells were gated as in Fig 1A. To assess



blood monocyte activation prior to infiltration, we measured Toll like receptor 4 (TLR4)/MD-2 upregulation (D) and intracellular TNF- $\alpha$  production (E) in response to lipopolysaccharide (LPS, 10 ng/ml) in mice that receive either saline containing pumps or AngII (1.5 mg/kg/day) after 4 days. Monocytes were identified as SSC<sup>Low</sup>CD115<sup>+</sup>F4/80<sup>+</sup>. F) Representative flow cytometric plots of blood monocytes following either the Ly-6c<sup>lo</sup> or Ly-6c<sup>hi</sup> bead labeling protocol (Tacke et al., 2006). G) Saline or AngII was infused using the Ly-6c<sup>hi</sup> labeling protocol (as in Fig 3B) or BrdU pulsing (2 mg/mouse injected *i.p.* 48 and 24 hrs prior to harvest – as in Fig 3C). All CD45<sup>+</sup>F4/80<sup>+</sup>CD11b<sup>+</sup> bead<sup>+</sup> or BrdU<sup>+</sup> cells were gated on and their respective MHC-II and Ly6c profiles are shown (in Auto<sup>+</sup> and Auto<sup>-</sup> gates) in order to demonstrate where the progeny of infiltrating cardiac Ly6c<sup>hi</sup> monocytes reside. At least 2 independent experiments, with 4-7 mice per group. \* P<0.05.

**Figure S3. CCR2<sup>+</sup> macrophage repopulation was dependent on blood monocyte input (related to Fig 4).**

A) Percentage of blood monocytes in *Ccr2*<sup>GFP/+</sup> and *Ccr2*<sup>GFP/GFP</sup> mice. B-C) *Ccr2*<sup>GFP/+</sup> and *Ccr2*<sup>GFP/GFP</sup> mice were injected with either control liposomes or clodronate liposomes (macrophage depletion). After 7 days the percentage of CCR2<sup>+</sup>MHC-II<sup>hi</sup> macrophages (B) or the total number of cells (C) is shown. At least 2 independent experiments, with 4-8 mice per group. \* P<0.05.

**Figure S4. Development of cardiac MHC-II<sup>hi</sup> macrophages after birth (related to Fig 5).**

A) Development of MHC-II<sup>hi</sup> macrophages over time. Cardiac macrophages were analyzed at E14.5, and either 3 or 8 weeks after birth in WT mice. Samples were gated on live CD45<sup>+</sup>Auto<sup>+</sup>F4/80<sup>+</sup>CD11b<sup>+</sup>Ly6c<sup>-</sup>CD11c<sup>-</sup> macrophages and the percentage of MHC-II<sup>hi</sup> resident macrophages is shown. B) Liver samples from *FLT3-Cre x Rosa mTmG* mice at E14.5 or 10 weeks of age were gated on SSC<sup>lo</sup>CD45<sup>+</sup>F4/80<sup>-</sup>CD11b<sup>-</sup> lymphocytes. FLT3-Cre recombination rates are given. 2-4 litters for each time point with pooled tissue from 2-6 embryos per animal were used in embryonic studies. At least 2 independent experiments, with 3-4 mice per group.

**Figure S5. Dynamic relationship between FLT3-Cre<sup>-</sup> tissue macrophages and FLT3-Cre<sup>+</sup> blood**

**monocytes after macrophage depletion (related to Fig 5).** A) *Flt3-Cre x Rosa mTmG* E14.5 fetal liver Tom<sup>+</sup>

CD150<sup>+</sup> HSCs were sorted and adoptively transplanted into sub-lethally irradiated adult WT mice. Time course of FLT3-driven recombination in the recipient mouse within the engrafted monocyte pool following transplant, from 0-16 weeks. At 0 weeks, FLT3<sup>-</sup> (100% TdTom<sup>+</sup>) HSCs were transplanted and there was increased recombination over time, reaching a plateau at ~8 weeks. B) After HSC transplant as in Fig S5A, cardiac tissue or lung tissue was isolated and macrophage subsets analyzed for FLT3 recombination within the engrafted resident macrophages and blood monocytes. FLT3 recombination was normalized for recombination in blood monocytes. Cardiac samples were gated based on the regions in Fig 1A. Lung macrophages were identified as live CD45<sup>+</sup>CD11c<sup>hi</sup>F4/80<sup>hi</sup>CD11b<sup>lo</sup>SSC<sup>hi</sup>MHC-II<sup>low</sup>. C-E) *FLT3-Cre* x *Rosa* mTmG mice were injected with either control liposomes (control) or clodronate liposomes (macrophages depletion) and various tissues were harvested 6 weeks later. C-D) Cardiac tissue; E) Liver, spleen and brain. FLT3 recombination rates were normalized for recombination in blood Ly-6c<sup>hi</sup> monocytes. Liver macrophages were identified as live CD45<sup>+</sup>CD11b<sup>+</sup>CD11c<sup>lo</sup>F4/80<sup>+</sup>CD64<sup>+</sup>, splenic macrophages were identified as live CD45<sup>+</sup>F4/80<sup>hi</sup>CD11b<sup>lo</sup>MHC-II<sup>lo</sup>, and brain microglia were identified as live CD45<sup>lo</sup>CD11b<sup>hi</sup>F4/80<sup>+</sup>. At least 2 independent experiments, with 3-5 mice per group. \* P<0.05, \*\* P<0.01.

**Figure S6. Transcriptional and functional analysis of cardiac macrophage subsets (related to Fig 7).**

Blood Ly-6c<sup>hi</sup> monocytes (yellow), MHC-II<sup>hi</sup> CCR2<sup>-</sup> macrophages (R1, Pink) MHC-II<sup>lo</sup> CCR2<sup>-</sup> macrophages (R2, brown) and CCR2<sup>+</sup> MHC-II<sup>hi</sup> macrophages (R8, purple) were sorted from *Ccr2*<sup>GFP/+</sup> mice (4 replicates, 2-4 mice per replicate). Global transcriptional array was performed on extracted RNA as described in the materials and methods. A) Principle component analysis including all 4 subsets, and only cardiac macrophages. B) Hierarchical clustering of endosomal genes between cardiac macrophage subsets. C) FITC-dextran was injected *i.v.* and tissue was harvested at either 3 or 16 hours post injection. Dextran uptake was assessed by flow cytometry. Graphed data represent the geometric MFI (gMFI) of FITC dextran in each macrophage subset at 3 hrs, and also includes cardiac DC subsets, which were gated as in Fig 1D. Splenic macrophages were identified as live CD45<sup>+</sup>F4/80<sup>hi</sup>CD11b<sup>lo</sup>. Background fluorescence was subtracted from each subset based on gMFI in

mice that were uninjected. Each experiment was repeated at least twice, n=4-5 per group. \*\* P <0.01 vs. control. # <0.01 vs. R2 macrophages.

**Figure S7. Steady state ontological schematic of cardiac and other resident tissues macrophages (related to all figures).** Green indicates a FLT3-HSC dependent origin, red indicates a FLT3-independent origin (FLT3-Cre<sup>-</sup>), however still derived from HSC fetal monocytes that have not recombined in the embryo due to rapid progression through FLT3<sup>+</sup> intermediate (Boyer et al., 2012), and blue indicates a yolk sac (YS) macrophage origin (FLT-3 independent). A) As early as E9.5-E10.5 yolk sac-derived macrophages (CX3CR1<sup>hi</sup>MHC-II<sup>lo</sup>Gr-1<sup>-</sup>) infiltrate the heart, lung and other tissues (Hoeffel et al., 2012; Schulz et al., 2012). From E12.5 → E16.5, increasing numbers of FLT-3 dependent, fetal liver monocyte-derived macrophages (CX3CR1<sup>lo</sup>Gr1<sup>±</sup>MHC-II<sup>±</sup>) infiltrate various tissue beds in parallel with yolk sac-derived macrophage populations. Most fetal liver monocyte-derived macrophages transiently pass through a FLT3<sup>+</sup> stage, and therefore have very inefficient FLT3-mediated recombination of the reporter (*Rosa* mTmG locus), and remain FLT3-Cre<sup>-</sup> despite originating from definitive HSCs. B) Adult myocardium contained four cardiac macrophage populations (regions R1-R4 are as outlined in Fig 1A). Embryonically established, yolk sack and fetal monocyte-derived MHC-II<sup>lo</sup>CD11c<sup>lo</sup> macrophages (R1-CD11c<sup>lo</sup>) develop into MHC-II<sup>hi</sup>CD11c<sup>lo</sup> macrophages (R2-CD11c<sup>lo</sup>) after birth, and replenish through *in situ* proliferation without blood monocyte input. Infiltrating, FLT3-dependent monocytes differentiate into either CCR2<sup>+</sup>CD11c<sup>hi</sup>MHC-II<sup>hi</sup> macrophages (R1-CD11c<sup>hi</sup>) or into a mixed population of CCR2<sup>-</sup>Ly6c<sup>hi</sup>MHC-II<sup>lo</sup> macrophages (R3). Purple indicates macrophages (MerTK<sup>+</sup>CD64<sup>+</sup>) while orange represents monocytes (R4, MerTK<sup>-</sup>CD64<sup>+</sup>). C) Relative contributions in adult resident tissues macrophages from yolk sac macrophages, FLT3-Cre<sup>-</sup> and FLT3-dependent (FLT3-Cre<sup>+</sup>) progenitors.

**Table S1. Antibodies used.**

| Target           | Clone            | Source                        |
|------------------|------------------|-------------------------------|
| CCR2             | 475301           | R&D                           |
| Ly6G             | 1A8              | BD Biosciences /<br>Biolegend |
| CD11b            | M1/70            | BD Biosciences /<br>Biolegend |
| B220             | RA3-6B2          | Biolegend                     |
| F4/80            | C1:A3-1          | BD Biosciences /<br>Biolegend |
| I-A <sup>b</sup> | AF6-120.1        | BD Biosciences /<br>Biolegend |
| Ly6c             | AL-21<br>HK1.4   | BD Biosciences /<br>Biolegend |
| CD115            | AFS98            | BD Biosciences /<br>Biolegend |
| MerTK            | 108928<br>BAF591 | R&D<br>R&D                    |
| Streptavidin     | PE-Cy7           | Biolegend                     |
| Gr-1             | RB6-8C5          | Biolegend                     |
| CD206            | C068C2           | Biolegend                     |
| CD11c            | N418             | BD Biosciences /<br>Biolegend |
| TLR4/MD2         | MTS510           | Biolegend                     |
| CD64             | X54-5/7.1        | Biolegend                     |
| CD45.1           | A20              | Biolegend                     |
| CD45.2           | 104              | Biolegend                     |
| CD45             | 30-F11           | Biolegend                     |
| CD103            | 2E7              | Biolegend                     |
| CD16/CD32        | 2.4G2            | BD Biosciences                |
| BrdU             | Bu20a            | Biolegend                     |
| Ki67             | 16A8             | Biolegend                     |
| TNF- $\alpha$    | MP6-XT22         | Biolegend                     |

**Table S2: Conserved genes across different tissue macrophage subsets**

| MHC-II <sup>lo</sup> CCR2 <sup>+</sup> macrophages |         |      | MHC-II <sup>hi</sup> CCR2 <sup>+</sup> macrophages |         |      | CCR2 <sup>+</sup> MHC-II <sup>hi</sup> macrophages |         |      |
|----------------------------------------------------|---------|------|----------------------------------------------------|---------|------|----------------------------------------------------|---------|------|
| Gene                                               | P value | Fold | Gene                                               | P value | Fold | Gene                                               | P value | Fold |
| <b>C1qc</b>                                        | 1.4E-14 | 1446 | <b>C1qc</b>                                        | 1.6E-14 | 1318 | <b>C1qc</b>                                        | 4.6E-14 | 1108 |
| <b>Pmp22</b>                                       | 1.3E-12 | 407  | <b>Pmp22</b>                                       | 1.5E-12 | 365  | <b>C1qa</b>                                        | 4.0E-11 | 268  |
| <b>C1qa</b>                                        | 4.7E-11 | 358  | Pla2g2d                                            | 1.6E-07 | 360  | <b>Cd81</b>                                        | 3.5E-10 | 261  |
| <b>Fcna</b>                                        | 1.0E-09 | 323  | <b>C1qa</b>                                        | 5.2E-11 | 333  | <b>Ccl12</b>                                       | 1.9E-10 | 220  |
| <b>Cd81</b>                                        | 2.5E-10 | 293  | <b>Cd81</b>                                        | 2.1E-10 | 329  | Mb                                                 | 1.5E-11 | 171  |
| Pla2g2d                                            | 2.4E-07 | 282  | <b>Ccl12</b>                                       | 8.2E-11 | 296  | <b>Rgs1</b>                                        | 3.0E-10 | 143  |
| <b>Lyve1</b>                                       | 3.3E-10 | 263  | <b>Slco2b1</b>                                     | 2.4E-10 | 280  | <b>C1qb</b>                                        | 3.9E-11 | 113  |
| <b>Igf1</b>                                        | 1.6E-12 | 255  | <b>Igf1</b>                                        | 2.3E-12 | 200  | <b>Slco2b1</b>                                     | 7.4E-10 | 109  |
| <b>Slco2b1</b>                                     | 3.2E-10 | 230  | <b>Stab1</b>                                       | 8.8E-11 | 166  | Mmp12                                              | 6.2E-10 | 108  |
| <b>Mrc1</b>                                        | 7.8E-10 | 182  | <b>Cd63</b>                                        | 4.8E-12 | 162  | <b>Mertk</b>                                       | 3.5E-10 | 94   |
| <b>Cd63</b>                                        | 4.4E-12 | 171  | <b>Mrc1</b>                                        | 1.3E-09 | 138  | Ccl4                                               | 3.4E-08 | 94   |
| <b>Mertk</b>                                       | 1.2E-10 | 148  | <b>Mertk</b>                                       | 1.3E-10 | 138  | <b>Mrc1</b>                                        | 4.5E-09 | 83   |
| Vsig4                                              | 2.1E-08 | 134  | <b>Fcna</b>                                        | 6.2E-09 | 113  | <b>Cd63</b>                                        | 2.8E-11 | 82   |
| <b>C1qb</b>                                        | 5.9E-11 | 120  | <b>Lyve1</b>                                       | 1.6E-09 | 106  | <b>Stab1</b>                                       | 3.5E-10 | 73   |
| <b>Fn1</b>                                         | 5.7E-07 | -199 | <b>Chi333</b>                                      | 4.0E-06 | -196 | <b>Plac8</b>                                       | 1.5E-05 | -39  |
| <b>F10</b>                                         | 1.0E-07 | -209 | <b>Sell</b>                                        | 5.3E-07 | -199 | <b>Sell</b>                                        | 5.3E-06 | -59  |
| <b>Chi333</b>                                      | 2.7E-06 | -252 | <b>F10</b>                                         | 7.4E-08 | -254 | Hba-a1                                             | 1.1E-05 | -60  |
| Napsa                                              | 2.4E-08 | -254 | <b>Plac8</b>                                       | 5.3E-07 | -317 | Hba-a2                                             | 7.1E-06 | -81  |
| <b>Plac8</b>                                       | 4.8E-07 | -337 | Ear2                                               | 4.1E-13 | -417 | Hbb-b1                                             | 1.3E-06 | -104 |
| Ear2                                               | 4.2E-13 | -409 | <b>Fn1</b>                                         | 1.1E-07 | -586 | Hbb-b2                                             | 4.6E-07 | -130 |

3/6 populations  
4/6 populations  
5/6 populations  
6/6 populations

| Lung macrophages |          |      | Microglia      |         |      | Peritoneal macrophages |         |      |
|------------------|----------|------|----------------|---------|------|------------------------|---------|------|
| Gene             | P value  | Fold | Gene           | P value | Fold | Gene                   | P value | Fold |
| Ear1             | 1.48E-12 | 249  | <b>C1qc</b>    | 1.0E-15 | 132  | Vsig4                  | 1.3E-07 | 162  |
| <b>Mertk</b>     | 1.13E-09 | 56   | <b>C1qb</b>    | 6.9E-16 | 79   | <b>C1qc</b>            | 1.5E-15 | 115  |
| Dab2             | 1.19E-09 | 44   | <b>C1qa</b>    | 5.6E-15 | 77   | <b>C1qa</b>            | 1.2E-14 | 62   |
| <b>Mrc1</b>      | 4.33E-09 | 37   | <b>Slco2b1</b> | 3.7E-14 | 74   | <b>C1qb</b>            | 4.1E-15 | 48   |
| Myo1e            | 2.08E-11 | 29   | <b>Cd81</b>    | 1.4E-15 | 69   | <b>Pmp22</b>           | 1.3E-11 | 41   |
| Spp1             | 8.09E-08 | 28   | <b>Mertk</b>   | 1.9E-09 | 48   | Ephx1                  | 1.0E-10 | 30   |
| Ear2             | 9.38E-08 | 25   | <b>Pmp22</b>   | 1.5E-11 | 39   | Fgfr1                  | 5.7E-13 | 29   |
| <b>Rgs1</b>      | 5.86E-06 | 17   | <b>Rgs1</b>    | 6.8E-07 | 30   | <b>Mertk</b>           | 2.7E-08 | 24   |
| <b>Cd81</b>      | 6.48E-13 | 16   | <b>Ccl12</b>   | 5.9E-11 | 29   | <b>Fcna</b>            | 7.4E-10 | 24   |
| <b>Slco2b1</b>   | 3.42E-11 | 15   | <b>Stab1</b>   | 1.8E-07 | 14   | Dab2                   | 3.4E-08 | 19   |
| Rhoc             | 4.45E-11 | 11   | Ccl4           | 1.2E-09 | 12   | <b>Cd81</b>            | 3.0E-13 | 19   |
| <b>Cd63</b>      | 3.69E-10 | 11   | Cxcl16         | 1.1E-09 | 9    | Myo1e                  | 8.5E-10 | 13   |
| Mt2              | 1.63E-07 | 7    | Ephx1          | 7.3E-08 | 8    | <b>Igf1</b>            | 4.3E-09 | 8    |
| Ctnbnp2nl        | 5.49E-06 | 6    | <b>Cd63</b>    | 2.3E-09 | 8    | <b>Lyve1</b>           | 6.1E-06 | 6    |
| Hp               | 2.99E-10 | -39  | <b>F10</b>     | 1.4E-10 | -17  | <b>Sell</b>            | 8.5E-07 | -8   |
| I830127L07Rik    | 1.89E-12 | -56  | <b>Sell</b>    | 1.5E-10 | -49  | Ear2                   | 8.2E-07 | -15  |
| <b>Sell</b>      | 3.62E-11 | -74  | <b>Plac8</b>   | 1.0E-09 | -52  | <b>Chi333</b>          | 1.3E-07 | -16  |
| Serp1b10         | 1.04E-11 | -89  | Sirpb1b        | 7.4E-13 | -75  | Sirpb1b                | 3.1E-10 | -17  |
| <b>Plac8</b>     | 1.26E-10 | -99  | <b>Chi333</b>  | 1.4E-10 | -103 | Mmp8                   | 1.5E-12 | -85  |
| Ifitm6           | 2.16E-11 | -127 | <b>Fn1</b>     | 6.3E-11 | -117 | <b>Plac8</b>           | 1.3E-10 | -97  |

**Table S3: GO Enrichment analysis between cardiac macrophage subsets**

| CCR2 <sup>+</sup> vs MHC-II <sup>hi</sup>    |            |                      | CCR2 <sup>+</sup> vs MHC-II <sup>lo</sup>                                         |            |                       | MHC-II <sup>hi</sup> vs. MHC-II <sup>lo</sup>                                             |            |                       |
|----------------------------------------------|------------|----------------------|-----------------------------------------------------------------------------------|------------|-----------------------|-------------------------------------------------------------------------------------------|------------|-----------------------|
| Name                                         | Enrichment | P value              | Name                                                                              | Enrichment | P value               | Name                                                                                      | Enrichment | P value               |
| regulation of immune system process          | 17.3766    | 2.8x10 <sup>-8</sup> | immune system process                                                             | 30.3062    | 6.9x10 <sup>-14</sup> | antigen processing and presentation of exogenous peptide antigen via MHC class II         | 20.8933    | 8.4x10 <sup>-10</sup> |
| positive regulation of immune system process | 15.7848    | 1.4x10 <sup>-7</sup> | regulation of immune system process                                               | 28.2021    | 5.7x10 <sup>-13</sup> | antigen processing and presentation of peptide antigen via MHC class II                   | 20.2968    | 1.5x10 <sup>-9</sup>  |
| regulation of immune response                | 15.4374    | 1.9x10 <sup>-7</sup> | regulation of response to stimulus                                                | 25.5101    | 8.3x10 <sup>-12</sup> | antigen processing and presentation of peptide or polysaccharide antigen via MHC class II | 19.7786    | 2.6x10 <sup>-9</sup>  |
| immune system process                        | 14.8988    | 3.4x10 <sup>-7</sup> | regulation of defense response                                                    | 25.1818    | 1.2x10 <sup>-11</sup> | antigen processing and presentation of exogenous peptide antigen                          | 19.1099    | 5.0x10 <sup>-9</sup>  |
| regulation of T cell activation              | 14.0558    | 7.9x10 <sup>-7</sup> | regulation of T cell activation                                                   | 23.6557    | 5.3x10 <sup>-11</sup> | antigen processing and presentation of exogenous antigen                                  | 18.1979    | 1.3x10 <sup>-8</sup>  |
| regulation of response to stimulus           | 12.5639    | 3.5x10 <sup>-6</sup> | regulation of immune response                                                     | 22.2452    | 2.2x10 <sup>-10</sup> | antigen processing and presentation of peptide antigen                                    | 16.8336    | 4.9x10 <sup>-8</sup>  |
| cellular component movement                  | 12.5189    | 3.7x10 <sup>-6</sup> | positive regulation of response to stimulus                                       | 22.0174    | 2.7x10 <sup>-10</sup> | immune response                                                                           | 15.5869    | 1.7x10 <sup>-8</sup>  |
| regulation of T cell proliferation           | 12.3021    | 4.5x10 <sup>-6</sup> | immune response                                                                   | 21.7299    | 3.7x10 <sup>-10</sup> | antigen processing and presentation                                                       | 14.9451    | 3.2x10 <sup>-7</sup>  |
| positive regulation of immune response       | 12.1926    | 5.1x10 <sup>-6</sup> | regulation of inflammatory response                                               | 21.3868    | 5.2x10 <sup>-10</sup> | chaperone mediated protein folding requiring cofactor                                     | 14.8946    | 3.4x10 <sup>-7</sup>  |
| regulation of inflammatory response          | 11.6302    | 8.9x10 <sup>-6</sup> | antigen processing and presentation of exogenous peptide antigen via MHC class II | 20.9729    | 7.8x10 <sup>-10</sup> | 'de novo' posttranslational protein folding                                               | 14.09      | 7.6x10 <sup>-8</sup>  |

## **Supplemental Experimental Procedures**

### **Mice.**

6-12 week old C57BL/6J mice (The Jackson Laboratory) were used for this study and were bred in our animal facility prior to use. *Cx3cr1<sup>GFP/+</sup>* C57BL/6 were kindly provided by Dr. Daniel Link (Jung et al., 2000). *Zbtb46<sup>GFP/+</sup>* mice were provided by Dr. Kenneth M Murphy and have been previously described (Qi et al., 2009; Tailor et al., 2008; Xu et al., 2012; Edelson et al., 2011; Satpathy et al., 2012). *Flt3*-Cre mice were a kind gift from Dr. Thomas Boehm and were crossed with *Rosa* mTmG C57BL/6 reporter mice (Jackson) (Boyer et al., 2011). *Ccr2*-GFP mice were generated by insertion of GFP under control of the native *CCR2* promoter (Satpathy et al., 2013). *Ccr2<sup>GFP/GFP</sup>* mice had reduced blood Ly6c<sup>hi</sup> as has previously been described for *Ccr2<sup>-/-</sup>* mice (Serbina and Pamer, 2006). *CD115-Mer-iCre-Mer* mice were provided by Dr. Jeffry Pollard (Qian et al., 2011) and were crossed with the *Rosa* mTmG reporter. Tamoxifen (2 mg) was gavaged in 100 µl of corn oil at E8.5 to label yolk sac macrophages (Schulz et al., 2012). *Mlc2V-Cre Rosa tdTomato* mice express the TdTom reporter only in cardiac ventricular myocardium (Chen et al., 1998), and were a kind gift from Dr. Stacey Rentschler. All mice were bred and maintained at the Washington University School of Medicine and experimental procedures were done in accordance with the animal-use oversight committees.

### **Tissue isolation.**

Mice were euthanized by CO<sub>2</sub> fixation, blood was isolated into heparinized syringes. Hearts were then perfused with 20 ml of cold PBS. Hearts, lungs, kidneys, brains and livers were minced finely and digested with shaking for 1 hr at 37°C in DMEM containing collagenase I, collagenase XI, DNase I, and hyaluronidase (Sigma) enzymes (Nahrendorf et al., 2007). Experiments in which MerTK was used required digestion in Collagenase D (Roche) and DNase I for 30 min at 37°C. The digested material from heart, lungs and kidneys was filtered through 40 µm filters and pelleted by centrifugation (400xg for 5 min at 4°C) in HBSS supplemented with 2% FCS + 0.2% BSA. Red blood cells were lysed in ACK lysis buffer (InVitrogen) and then resuspended in FACS buffer (PBS containing 2% FCS and 2 mM EDTA). Liver and brain were filtered and resuspended into 40%

Percoll, and the brain was layered over 80% percoll prior to centrifugation. Brain microglial were collected at the interface, washed and resuspended in FACS buffer. Liver pellets were resuspended, remaining RBCs were lysed as above and samples resuspended in FACS buffer. Skin was shaved, excised cut and floated in Liberase (400 µg/ml in RPMI) epidermis side up for 30 min at 37°C. The tissue was minced and broken up by pipetting, filtered through a 100 µM strainer, washed with RPMI and resuspended in FACS buffer. Spleens were removed, minced and triturated through 40 µM filters in HBSS, RBC lysed as above and resuspended in FACS solution. Peritoneal lavage was performed in naive mice with ice cold HBSS + 0.2% BSA. Peritoneal cells were spun down and RBCs were lysed. Blood was collected into heparinized syringes, RBCs were lysed and resuspended in FACS buffer. Embryonic tissue age was estimated by assessing for the presence of vaginal plug. Tissues were removed in cold HBSS, minced and digested as above for 45 min (except the YS, which was digest for 90 min), and resuspended in FACS buffer. To assess tissue IL-1 $\beta$  production, cardiac tissue was isolated, disrupted by dounce homogenization in ice cold lysis buffer (Cell Lysis Buffer, Cell Signaling). Cellular debris was removed by centrifugation (12,000 x g, 20 min, 4°C). Cardiac tissue supernatant protein content was determined (Pierce), and 500 µg of each sample was used to detect IL-1 $\beta$  by commercial ELISA assay (R&D systems).

### **Antibodies and flow cytometry.**

All antibodies used in this study are listed in supplemental table 1. All flow cytometric analysis was done on either an LSR Fortessa or FACS Canto II. Samples were blocked with Fc block (BD Bioscience) for 15 min prior to labeling for 30 min at 4°C with antibodies and washed in FACS buffer. After gating on CD45<sup>+</sup> cells, doublets were excluded and live cells were analyzed (DAPI exclusion). Total cell counts were estimated by the total number of events / sample per mg of tissue. For intracellular staining, samples were stimulated in RPMI + 10% FCS (Gibco) with LPS for 3 hours in the presence of monensin in non-adherent plates. Cells were collected, washed and cell surface molecules were labeled as above. Antibodies were washed off, the samples were fixed/permeabilized (CytoFix/CytoPerm BD Bioscience), and then labeled with anti-TNF- $\alpha$ . For



proliferation experiments, 2 mg of BrdU (Sigma) was injected *i.p.* 2 hrs prior to harvest and for Ly-6c<sup>Hi</sup> labeling experiments, 1 mg of BrdU was injected daily for the indicated time points (Zhu et al., 2009). To detect intracellular BrdU, the BD Bioscience Cytofix/cytoperm technique was used. Briefly, cells were fixed after cell surface staining as above, DNA was digested for 1 hour with DNase (Sigma), and then samples were labeled with anti-BrdU antibody. Clodronate-loaded liposomes were produced as previously described and contained 18 mg of clodronate / ml of beads (Seiler et al., 1997). 100 ul / 30 g mouse was injected *i.v.* for depletion studies. Peripheral blood Ly-6c<sup>Hi</sup> and Ly-6c<sup>Low</sup> monocytes were labeled *in vivo* with 1 µm fluorescent microspheres (Polyscience, PA) as previously described (Tacke et al., 2007). To assess macrophage antigen sampling, 100 µL of 0.2% FITC-dextran (70 kDa, Sigma) was injected into the tail vein *i.v.*. Cardiac tissue, blood and spleen was isolated at the indicated time points and processed as above. Cardiac tissue macrophages were gated as indicated in the figure legends. The four macrophage populations were gated as in Fig 1 and summarized in Fig S7. Cardiac macrophages were all live CD45<sup>+</sup>F4/80<sup>+</sup> CD11b<sup>+</sup>Auto<sup>+</sup>. Total cardiac macrophages were further stratified by the following gating: R1-CD11c<sup>lo</sup>: CD11c<sup>lo</sup>CD206<sup>+</sup>CX3CR1<sup>hi</sup>Ly6c<sup>-</sup> CCR2<sup>-</sup>MHC-II<sup>hi</sup>, R2-CD11c<sup>lo</sup>: CD11c<sup>lo</sup>CD206<sup>+</sup>CX3CR1<sup>int</sup>Ly6c<sup>-</sup>CCR2<sup>-</sup>MHC-II<sup>lo</sup>; R3-Ly6c<sup>+</sup>: CD11c<sup>lo</sup>CD206<sup>+</sup> CX3CR1<sup>hi</sup>Ly6c<sup>+</sup>CCR2<sup>-</sup>MHC-II<sup>+</sup>; R1-CD11c<sup>hi</sup>: CD11c<sup>hi</sup>CD206<sup>+</sup>CX3CR1<sup>hi</sup>Ly6c<sup>-</sup>CCR2<sup>+</sup>MHC-II<sup>hi</sup>CD103<sup>-</sup>. Other resident tissue macrophages were gated as follows. Lung: CD45<sup>+</sup>CD11c<sup>hi</sup>F4/80<sup>hi</sup>CD11b<sup>lo</sup>SSC<sup>hi</sup>MHC-II<sup>lo</sup>. Brain Microglia: CD45<sup>lo</sup>CD11b<sup>hi</sup>F4/80<sup>+</sup>. Kidney: CD45<sup>+</sup>F4/80<sup>hi</sup>CD11b<sup>lo-int</sup>, splenic: CD45<sup>+</sup>F4/80<sup>hi</sup>CD11b<sup>lo</sup>; Liver: CD45<sup>+</sup>CD11b<sup>hi</sup>F4/80<sup>hi</sup>CD64<sup>+</sup>CD11c<sup>lo</sup>; Skin: CD45<sup>+</sup>MerTK<sup>+</sup>CD64<sup>+</sup>.

### **Cell sorting and adoptive transfer.**

Cell sorting was performed using AriaII instrumentation (BD Bioscience). To sort macrophage populations in *Ccr2*<sup>GFP/+</sup> mice, we altered our digestion protocol to minimize activation. Minced cardiac tissue was digested for only 20 min in Collagenase D (Roche) and DNase I (as above). RBCs were lysed for 3 min. Cells were gated on live (DAPI), CD45<sup>+</sup>Auto<sup>+</sup>F4/80<sup>+</sup>CD11b<sup>+</sup> Ly6c<sup>-</sup>CD64<sup>+</sup>MerTK<sup>+</sup> macrophages and then stratified by MHC-II and CCR2 expression as in Fig 7A into the 3 three sorted macrophage populations. Blood was isolated

through cardiac puncture as described above. Ly6c<sup>hi</sup> blood monocytes were identified and sorted as live (DAPI<sup>-</sup>), CD45<sup>+</sup>F4/80<sup>+</sup>CD115<sup>+</sup>SSC<sup>lo</sup>Ly6c<sup>hi</sup>. All samples were sorted directly into either RPMI + 50% bovine serum for functional studies or into Trizol for RNA extraction (see below). Cytospins of the live sorted cells were prepared, stained with Hema 3 solution (Fischer Scientific) visualized at 20x (Zeiss Axioscope). Cross sectional area was calculated on AxioVision LE software. To sort fetal liver HSCs, E14.5 livers from *Flt3-Cre* x *Rosa*<sup>mTmG</sup> embryos were removed, dissociated on ice using frosted cover slips and 200 CD150<sup>hi</sup> Tom<sup>+</sup> KLS (c-Kit<sup>+</sup>Lin<sup>-</sup>Sca-1<sup>+</sup>) HSCs were adoptively transferred into sublethally irradiated (770 rads) male 8-10 week old C57BL/6 mice. Peripheral blood chimerism was assessed every 4 weeks for 16 weeks by analysis of fluorescence profiles within blood leukocyte populations (either Tom<sup>+</sup> and GFP<sup>+</sup>). Lung and cardiac tissue was harvested, engraftment percentages were calculated for each cellular subset by flow cytometry 16 weeks following adoptive transplant and normalized for engraftment rates in blood Ly6c<sup>hi</sup> monocytes.

### **Osmotic Mini-Pump Implantation, Myocardial infarction surgery and Parabiosis.**

For osmotic mini-pump (Alzet) implantation, mice were anesthetized with ketamine/xylazine, the back was shaved and mini pumps containing either saline or angiotensin II (AngII) (Bachem, 1.5 – 2.0 mg/kg/day) were implanted. The incisions were closed with silk sutures. Complete left anterior descending aorta occlusion was performed as previously described (Sondergaard et al., 2010). C57BL/6J and B6-Ly5.1 female mice controlled for age and weight were parabiosed. The mice were joined at the elbow and knee with dissolvable sutures and the incision was closed with wound clips. Postoperative care included administration of buprenex compound for pain management, 5% dextrose and 0.9% sodium chloride, nutritional gel packs provided in each cage and antibiotics (Sulfatrim) provided in the drinking water (Peng et al., 2013).

### **Transcriptional Array**

RNA from cardiac macrophages and blood monocytes was extracted from trizol samples using the qiagen micro-kit (Qiagen). Total RNA concentration and quality was determined by Agilent 2100 bioanalyzer (Agilent

Technologies) according to manufacturer's recommendations. RNA transcripts were first amplified by WTA2 kit (Sigma Aldrich). 1 ng of total RNA was amplified according to manufacturer's protocol. cDNAs were chemically labeled with Kreatech ULS labeling kit (Kreatech Diagnostics). Per reaction, 2.5  $\mu$ g of DNA was mixed with Kreatech labeling buffer and Kreatech cy5-ULS. The reactions were incubated at 85°C for 15 minutes in the dark and placed on ice for 3 minutes. Labeled DNAs were purified with QIAquick PCR purification columns (Qiagen Sciences). Labeled DNAs were quantitated on a Nanodrop spectrophotometer. 2  $\mu$ g of each labeled DNA was suspended in Agilent 2X Gene Expression hybridization buffer, Agilent 10X Blocking agent and Kreatech Kreablock. The hybridization solutions were applied to Agilent Mouse 4x44K microarrays. Hybridization was carried out at 65°C for 20 hours. Washing procedures were carried out according to Agilent gene expression protocols. Slides were scanned on an Agilent SureScan microarray scanner to detect Cy5 fluorescence. Gridding and analysis of images was performed using Agilent Feature Extraction v10.7.3.1. Background subtracted, log transformed, quantile normalized data were analyzed using ANOVA testing with contrasts (Partek GS, Partek, St. Louis, MO). For all pairwise tests we set our threshold at a two-fold change with a 99% confidence interval by moderated t test with Benjamini-Hochberg False Discovery Rate analysis. Hierarchical clustering analysis, heat map plot generation (without scaling) and gene ontology was performed using Partek GS. We imported gene array data (background subtracted, log transformed, quantile normalized) from Immgen (<http://www.immgen.org/>) for brain microglia (data files 111383, 11384, 113835), Lung M $\Phi$ s (data files 87584, 87585, 87586), Peritoneal F4/80<sup>Hi</sup> M $\Phi$ s (data files 105224, 105225, 105226) and blood Ly6c<sup>Hi</sup>MHC-II<sup>Neg</sup> monocytes (data files 96439, 96440, 96441) (Heng and Painter, 2008). We compared differentially expressed genes between blood Ly6c<sup>Hi</sup> monocytes and each M $\Phi$  subsets as indicated above.

### **Cardiomyocyte Phagocytosis Assay**

For cardiomyocyte labeling, hearts from WT mice were removed, digested as indicated above and resuspended in RPMI+10% FCS. Heart samples were incubated for 1 hour at 37°C in standard tissue culture plates. Non-adherent apoptotic / necrotic cells (DAPI<sup>+</sup> ~50%, data not shown) were removed and permanently labeled with

CellVue Claret Far Red Fluorescent Cell Linker Kit (Sigma) as per the manufacturer's instructions, and resuspended in RPMI+ 10% FCS. Separately, cardiac single cell suspensions or splenocytes from *Ccr2<sup>GFP/+</sup>* mice were labeled with cell surface antibodies at 4°C as described above, washed and resuspended in RPMI + 10% FCS. CellVue labeled cardiomyocytes were incubated with antibody-labeled cardiac and splenic samples at either 4°C or 37°C for 4 hours in order to distinguish cell surface binding (4°C) from active phagocytosis (37°C) in non-adherent tissue culture plates (Mounier et al., 2013). Cardiac and splenic samples were gated to identify MΦs, and the percentage of cells that were CellVue<sup>+</sup> was determined by flow cytometry.

### **Antigen Presenting Cell Assay**

The ability of cardiac MΦ to act as antigen presenting cells was assessed to Listeriolysin O (LLO) peptide and protein as described (Carrero et al., 2012). Briefly, cardiac MΦs and Ly-6c<sup>Hi</sup> monocytes were sorted into DMEM + 10% fetal calf serum. 5-7 mice were pooled and the assay was run in duplicate.  $2 \times 10^4$  cells were plated and incubated with LLO peptide (190-201) or a variant of the intact LLO protein (LLOWW) that is non-hemolytic for 2 hours at 37°C (Carrero et al., 2012).  $2 \times 10^5$  irradiated splenocytes served a positive control. T cell hybridoma specific for LLO(190-201) ( $5 \times 10^4$  cells) was added for ~16 hrs. Culture supernatants were tested for IL-2 production by CTLL-2 proliferation assay using <sup>3</sup>H-thymidine incorporation. All antigen presentation assays were performed in 200-μL final volume in 96-well tissue culture coated flat-bottom plates (Corning, Lowell, MA).

### **Statistics**

All data are presented as mean ± SEM. Two-tailed Student's t test was used for comparisons between experimental groups. Significant differences were defined at  $P < 0.05$ .

## Supplemental References

- Boyer,S.W., Beaudin,A.E., and Forsberg,E.C. (2012). Mapping differentiation pathways from hematopoietic stem cells using Flk2/Flt3 lineage tracing. *Cell Cycle* 11, 3180-3188.
- Boyer,S.W., Schroeder,A.V., Smith-Berdan,S., and Forsberg,E.C. (2011). All hematopoietic cells develop from hematopoietic stem cells through Flk2/Flt3-positive progenitor cells. *Cell Stem Cell* 9, 64-73.
- Carrero,J.A., Vivanco-Cid,H., and Unanue,E.R. (2012). Listeriolysin o is strongly immunogenic independently of its cytotoxic activity. *PLoS. One.* 7, e32310.
- Chen,J., Kubalak,S.W., and Chien,K.R. (1998). Ventricular muscle-restricted targeting of the RXRalpha gene reveals a non-cell-autonomous requirement in cardiac chamber morphogenesis. *Development* 125, 1943-1949.
- Edelson,B.T., Bradstreet,T.R., KC,W., Hildner,K., Herzog,J.W., Sim,J., Russell,J.H., Murphy,T.L., Unanue,E.R., and Murphy,K.M. (2011). Batf3-dependent CD11b(low/-) peripheral dendritic cells are GM-CSF-independent and are not required for Th cell priming after subcutaneous immunization. *PLoS. One.* 6, e25660.
- Heng,T.S. and Painter,M.W. (2008). The Immunological Genome Project: networks of gene expression in immune cells. *Nat. Immunol.* 9, 1091-1094.
- Hoeffel,G., Wang,Y., Greter,M., See,P., Teo,P., Malleret,B., Leboeuf,M., Low,D., Oller,G., Almeida,F., Choy,S.H., Grisotto,M., Renia,L., Conway,S.J., Stanley,E.R., Chan,J.K., Ng,L.G., Samokhvalov,I.M., Merad,M., and Ginhoux,F. (2012). Adult Langerhans cells derive predominantly from embryonic fetal liver monocytes with a minor contribution of yolk sac-derived macrophages. *J. Exp. Med.* 209, 1167-1181.
- Jung,S., Aliberti,J., Graemmel,P., Sunshine,M.J., Kreutzberg,G.W., Sher,A., and Littman,D.R. (2000). Analysis of fractalkine receptor CX(3)CR1 function by targeted deletion and green fluorescent protein reporter gene insertion. *Mol. Cell Biol.* 20, 4106-4114.

- Mounier,R., Theret,M., Arnold,L., Cuvellier,S., Bultot,L., Goransson,O., Sanz,N., Ferry,A., Sakamoto,K., Foretz,M., Viollet,B., and Chazaud,B. (2013). AMPK $\alpha$ 1 regulates macrophage skewing at the time of resolution of inflammation during skeletal muscle regeneration. *Cell Metab* 18, 251-264.
- Nahrendorf,M., Swirski,F.K., Aikawa,E., Stangenberg,L., Wurdinger,T., Figueiredo,J.L., Libby,P., Weissleder,R., and Pittet,M.J. (2007). The healing myocardium sequentially mobilizes two monocyte subsets with divergent and complementary functions. *J. Exp. Med.* 204, 3037-3047.
- Peng,H., Jiang,X., Chen,Y., Sojka,D.K., Wei,H., Gao,X., Sun,R., Yokoyama,W.M., and Tian,Z. (2013). Liver-resident NK cells confer adaptive immunity in skin-contact inflammation. *J. Clin. Invest* 123, 1444-1456.
- Qi,C.F., Li,Z., Raffeld,M., Wang,H., Kovalchuk,A.L., and Morse,H.C., III (2009). Differential expression of IRF8 in subsets of macrophages and dendritic cells and effects of IRF8 deficiency on splenic B cell and macrophage compartments. *Immunol. Res.* 45, 62-74.
- Qian,B.Z., Li,J., Zhang,H., Kitamura,T., Zhang,J., Campion,L.R., Kaiser,E.A., Snyder,L.A., and Pollard,J.W. (2011). CCL2 recruits inflammatory monocytes to facilitate breast-tumour metastasis. *Nature* 475, 222-225.
- Satpathy, A. T., Briseno, C. G., Lee, J. S., Ng, D., Manieri, N. A., KC, W., Wu, X., Thomas, S. R., Lee, W. L., Turkoz, M., McDonald, K. G., Meredith, M. M., Song, C, Guidos, C. J., Newberry, R. D., Ouyang, W, Murphy, T. L., Stappenbeck, T. S., Gommerman, J. L., Nussenzweig, M. C., Colonna, M., Kopan, R., and Muprhy, K. M. Notch2-dependent classical dendritic cells orchestrate intestinal immunity against attaching and effacing bacterial pathogens. *Nat.Immunol.* In Press. 2013.
- Ref Type: Generic
- Satpathy,A.T., KC,W., Albring,J.C., Edelson,B.T., Kretzer,N.M., Bhattacharya,D., Murphy,T.L., and Murphy,K.M. (2012). Zbtb46 expression distinguishes classical dendritic cells and their committed progenitors from other immune lineages. *J. Exp. Med.* 209, 1135-1152.

Schulz,C., Gomez,P.E., Chorro,L., Szabo-Rogers,H., Cagnard,N., Kierdorf,K., Prinz,M., Wu,B., Jacobsen,S.E., Pollard,J.W., Frampton,J., Liu,K.J., and Geissmann,F. (2012). A lineage of myeloid cells independent of Myb and hematopoietic stem cells. *Science* 336, 86-90.

Seiler,P., Aichele,P., Odermatt,B., Hengartner,H., Zinkernagel,R.M., and Schwendener,R.A. (1997). Crucial role of marginal zone macrophages and marginal zone metallophils in the clearance of lymphocytic choriomeningitis virus infection. *Eur. J. Immunol.* 27, 2626-2633.

Serbina,N.V. and Pamer,E.G. (2006). Monocyte emigration from bone marrow during bacterial infection requires signals mediated by chemokine receptor CCR2. *Nat. Immunol.* 7, 311-317.

Sondergaard,C.S., Hess,D.A., Maxwell,D.J., Weinheimer,C., Rosova,I., Creer,M.H., Piwnica-Worms,D., Kovacs,A., Pedersen,L., and Nolte,J.A. (2010). Human cord blood progenitors with high aldehyde dehydrogenase activity improve vascular density in a model of acute myocardial infarction. *J. Transl. Med.* 8, 24.

Tacke,F., Alvarez,D., Kaplan,T.J., Jakubzick,C., Spanbroek,R., Llodra,J., Garin,A., Liu,J., Mack,M., van,R.N., Lira,S.A., Habenicht,A.J., and Randolph,G.J. (2007). Monocyte subsets differentially employ CCR2, CCR5, and CX3CR1 to accumulate within atherosclerotic plaques. *J. Clin. Invest* 117, 185-194.

Tacke,F., Ginhoux,F., Jakubzick,C., van,R.N., Merad,M., and Randolph,G.J. (2006). Immature monocytes acquire antigens from other cells in the bone marrow and present them to T cells after maturing in the periphery. *J. Exp. Med.* 203, 583-597.

Taylor,P., Tamura,T., Morse,H.C., III, and Ozato,K. (2008). The BXH2 mutation in IRF8 differentially impairs dendritic cell subset development in the mouse. *Blood* 111, 1942-1945.

Xu,H., Zhu,J., Smith,S., Foldi,J., Zhao,B., Chung,A.Y., Outtz,H., Kitajewski,J., Shi,C., Weber,S., Saftig,P., Li,Y., Ozato,K., Blobel,C.P., Ivashkiv,L.B., and Hu,X. (2012). Notch-RBP-J signaling regulates the transcription factor IRF8 to promote inflammatory macrophage polarization. *Nat. Immunol.* 13, 642-650.

Zhu,S.N., Chen,M., Jongstra-Bilen,J., and Cybulsky,M.I. (2009). GM-CSF regulates intimal cell proliferation in nascent atherosclerotic lesions. *J. Exp. Med.* 206, 2141-2149.
